# Supplementary material
Source: PubMed Central journal article supplement (PMC3816716)
Supplement: NIHMS517584-supplement-01.pdf [file NIHMS517584-supplement-01.pdf]

# THE LANCET

## **Supplementary appendix**

This appendix formed part of the original submission and has been peer reviewed.  
We post it as supplied by the authors.

Supplement to: Inaba H, Greaves M, Mullighan CG. Acute lymphoblastic leukaemia.  
*Lancet* 2013; published online March 22. [http://dx.doi.org/10.1016/S0140-6736\(12\)62187-4](http://dx.doi.org/10.1016/S0140-6736(12)62187-4).

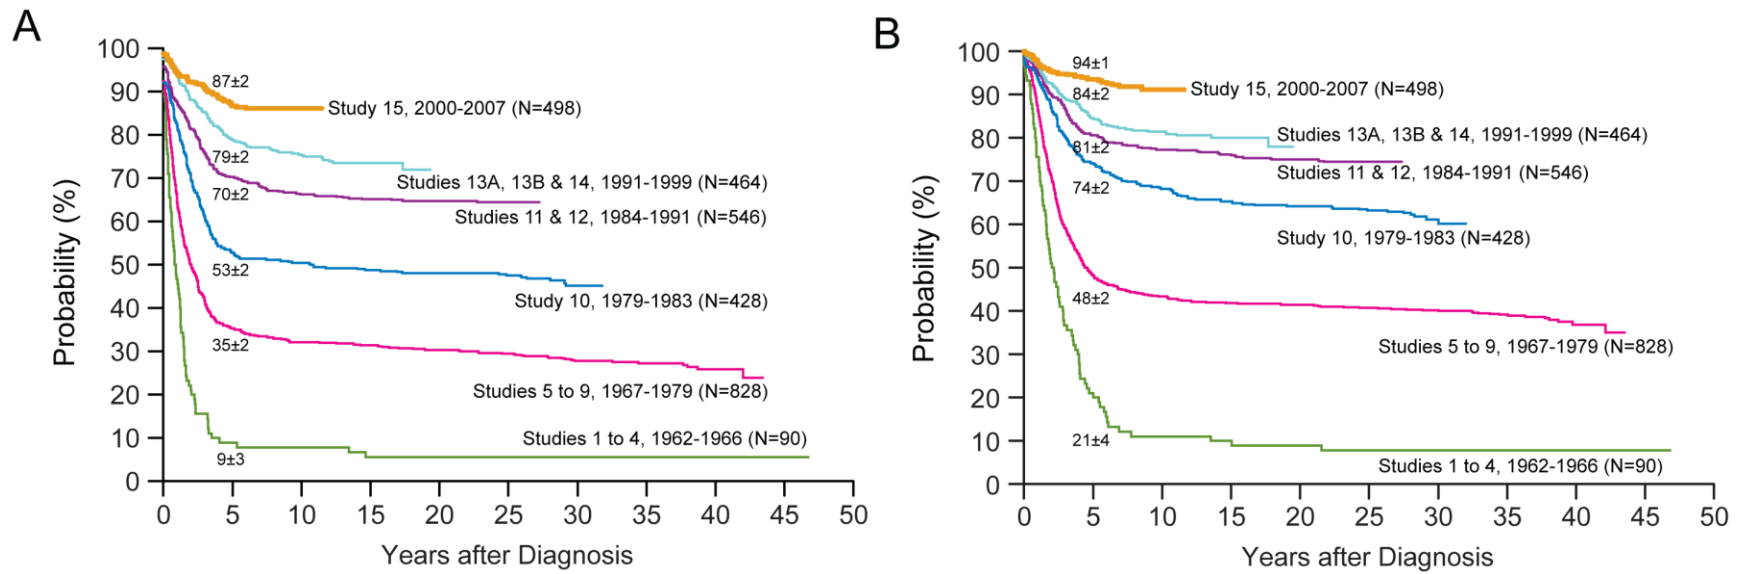

**Web Figure 1. Kaplan–Meier estimates of event-free survival (A) and overall survival (B) in 2852 children with newly diagnosed acute lymphoblastic leukaemia treated in 15 consecutive Total studies at St. Jude Children’s Research Hospital, 1962 to 2007. Five-year event-free and overall survival estimates ( $\pm$ SE) are shown on the respective curves.**

**Supplementary Table 1: Inherited gene variants and risk of childhood acute lymphoblastic leukaemia**

| Gene                | Function                               | Risk allele frequency* | Odds ratio <sup>†‡</sup> | P value <sup>‡</sup>    | References     |
|---------------------|----------------------------------------|------------------------|--------------------------|-------------------------|----------------|
| <i>IKZF1</i>        | Transcription factor (differentiation) | 0.27                   | 1.69                     | 1.2x10 <sup>-19</sup>   | <sup>1,3</sup> |
| <i>ARID5B</i>       | Transcriptional regulator              | 0.34                   | 1.65                     | 6.69 x10 <sup>-19</sup> | <sup>1,3</sup> |
| <i>CEBPE</i>        | Transcription factor (differentiation) | 0.52                   | 1.34                     | 2.88 x10 <sup>-7</sup>  | <sup>1,3</sup> |
| <i>CDKN2A (p16)</i> | Negative cell cycle regulator          | 0.15                   | 1.42                     | 3.01 x10 <sup>-11</sup> | <sup>4</sup>   |

\*Frequency in the control (white, Caucasian) population. <sup>†</sup>These odds ratio values apply to both B and T lymphoblastic leukaemia, and to the main molecular subtypes of the former including *ETV6-RUNX1*<sup>+</sup> acute lymphoblastic leukaemia and hyperdiploid acute lymphoblastic leukaemia. The exception appears to be with *ARID5B* variants which predominantly impact on hyperdiploid B lymphoblastic leukaemia.<sup>1,2</sup> <sup>‡</sup>All odds ratios and P values were obtained from a single study,<sup>1</sup> although similar values have been described in other studies.<sup>2,3</sup>

**Table 2. Key genetic alterations in B lymphoblastic leukaemia, by gene (referenced version)**

| <b>Gene</b>                  | <b>Alteration</b>                                                                    | <b>Frequency</b>                                                                                                                         | <b>Pathway and consequences</b>                                                                                                                                                  | <b>Clinical relevance</b>                                                       | <b>References</b> |
|------------------------------|--------------------------------------------------------------------------------------|------------------------------------------------------------------------------------------------------------------------------------------|----------------------------------------------------------------------------------------------------------------------------------------------------------------------------------|---------------------------------------------------------------------------------|-------------------|
| <i>PAX5</i>                  | Focal deletions, translocations, sequence mutations                                  | 31.7%                                                                                                                                    | Transcription factor needed for B-lymphoid development; mutations impair DNA binding and transcriptional activation                                                              | Not associated with adverse outcome                                             | 5-7               |
| <i>IKZF1</i>                 | Focal deletions, sequence mutations                                                  | 15% of paediatric cases<br>More than 80% of <i>BCR-ABL1</i> cases and 66% of cases of chronic myeloid leukaemia in lymphoid blast crisis | Transcription factor needed for development of haemopoietic stem cells to lymphoid precursors; deletions and mutations result in loss of function or dominant negative isoforms. | Associated with poor outcomes                                                   | 5, 6, 8, 9        |
|                              | Inherited variants                                                                   | A third of cases of high-risk <i>BCR-ABL1</i> -negative disease                                                                          |                                                                                                                                                                                  | Tripling of cumulative incidence of relapse                                     | 10-12             |
|                              |                                                                                      |                                                                                                                                          |                                                                                                                                                                                  | Increased risk of developing disease                                            | 1, 2              |
| <i>JAK1</i> ,<br><i>JAK2</i> | Pseudokinase and kinase domain mutations                                             | 18-35% of Down's-syndrome-associated cases, 11% of high-risk <i>BCR-ABL1</i> -negative cases                                             | Mutations cause constitutive JAK-STAT activation; transforms mouse Ba/F3-EpoR haemopoietic cell line                                                                             |                                                                                 | 13-16             |
| <i>CRLF2</i>                 | Rearrangement as <i>IGH@-CRLF2</i> or <i>P2RY8-CRLF2</i> resulting in overexpression | 5-16% of paediatric and adult cases and >50% of cases associated with Down's syndrome                                                    | Associated with mutant <i>JAK</i> in as much as 50% of cases; <i>CRLF2</i> and <i>JAK</i> mutations cotransform in Ba/F3 cells, causing constitutive STAT activation             |                                                                                 | 17-20             |
|                              |                                                                                      | 14% of paediatric high-risk cases of B lymphoblastic leukaemia                                                                           | Associated with <i>IKZF1</i> alteration and <i>JAK</i> mutations                                                                                                                 | Associated with poor outcome                                                    | 21, 22            |
| <i>CREBBP</i>                | Focal deletion and sequence mutations                                                | 19% of relapsed cases of B lymphoblastic leukaemia*                                                                                      | Impaired histone acetylation and transcriptional regulation                                                                                                                      | Mutations selected for at relapse and associated with glucocorticoid resistance | 23, 24            |

\* Also mutated in non-Hodgkin lymphoma.

**Supplementary Table 2: Clinical tests with prognostic and therapeutic implications**

| Test                            | Findings                                                 | Prognostic risk   | Potential treatment*                                                                                                                         |
|---------------------------------|----------------------------------------------------------|-------------------|----------------------------------------------------------------------------------------------------------------------------------------------|
| <b>At diagnosis</b>             |                                                          |                   |                                                                                                                                              |
| Immunophenotyping               | Early T cell precursor phenotype                         | High              | AML-directed therapy, JAK inhibitor                                                                                                          |
|                                 | CRLF2 overexpression <sup>†</sup>                        | High <sup>‡</sup> | JAK inhibitor <sup>§</sup>                                                                                                                   |
| Cytogenetics/RT-PCR             | Hyperdiploidy (>50 chromosomes)                          | Standard          |                                                                                                                                              |
|                                 | t(12;21)(p13;q22)/ <i>ETV6-RUNX1</i> ( <i>TEL-AML1</i> ) | Standard          |                                                                                                                                              |
|                                 | Hypodiploidy (<44 chromosomes)                           | High              |                                                                                                                                              |
|                                 | t(9;22)(q34;q11)/ <i>BCR-ABL1</i>                        | High              | ABL1 kinase inhibitor                                                                                                                        |
|                                 | 11q23/ <i>MLL</i> gene rearrangement                     | High <sup>#</sup> | Epigenetic therapy (eg, DNA methyltransferase inhibitor, histone methyltransferase inhibitor, histone deacetylase inhibitor), FLT3-inhibitor |
|                                 | iAMP21                                                   | High <sup>¶</sup> |                                                                                                                                              |
|                                 | t(17;19)(q22;p13)/ <i>TCF3-HLF</i>                       | High              |                                                                                                                                              |
| Molecular analysis <sup>†</sup> | <i>IKZF1</i> alterations                                 | High              | ABL1 kinase, PDGFRB, or JAK inhibitor                                                                                                        |
|                                 | <i>CRLF2</i> rearrangement                               | High <sup>‡</sup> | JAK inhibitor <sup>§</sup>                                                                                                                   |
|                                 | <i>JAK1</i> or <i>JAK2</i> mutation                      | High              | JAK inhibitor                                                                                                                                |
|                                 | <i>BCR-ABL1</i> -like phenotype                          | High              | ABL1 kinase, PDGFRB, or JAK inhibitor                                                                                                        |
|                                 | <i>NUP214-ABL1</i>                                       | High              | ABL1 kinase inhibitor                                                                                                                        |
|                                 | <i>BCR-JAK2</i>                                          | High              | JAK inhibitor                                                                                                                                |
|                                 | <i>IL7R</i> mutation                                     | High              | JAK inhibitor                                                                                                                                |
|                                 | <i>CREBBP</i> mutation                                   | High              | Histone deacetylase inhibitor                                                                                                                |
|                                 | <i>TP53</i> mutation                                     | High              |                                                                                                                                              |
| <b>During treatment</b>         |                                                          |                   |                                                                                                                                              |
| Minimal residual disease        | Positive                                                 | High              |                                                                                                                                              |

\*Clinical trials have not proven the efficacy of any therapies except ABL1 kinase inhibitor in acute lymphoblastic leukaemia with t(9;22)(q34;q11)/*BCR-ABL1*. <sup>†</sup>These tests have not been incorporated into routine clinical practice. <sup>‡</sup>The subsets with *IKZF1* alteration and/or *BCR-ABL1*-like gene expression profile. <sup>§</sup>The subsets with *JAK* mutations. <sup>¶</sup>Especially in infants and adult patients. <sup>#</sup>Poor outcome when treated on standard-risk regimens.

AML, acute myeloid leukaemia; JAK, Janus kinase; iAMP21, intrachromosomal amplification of chromosome 21; PDGFRB, platelet-derived growth factor receptor, beta polypeptide; RT-PCR, reverse-transcriptase polymerase chain reaction.

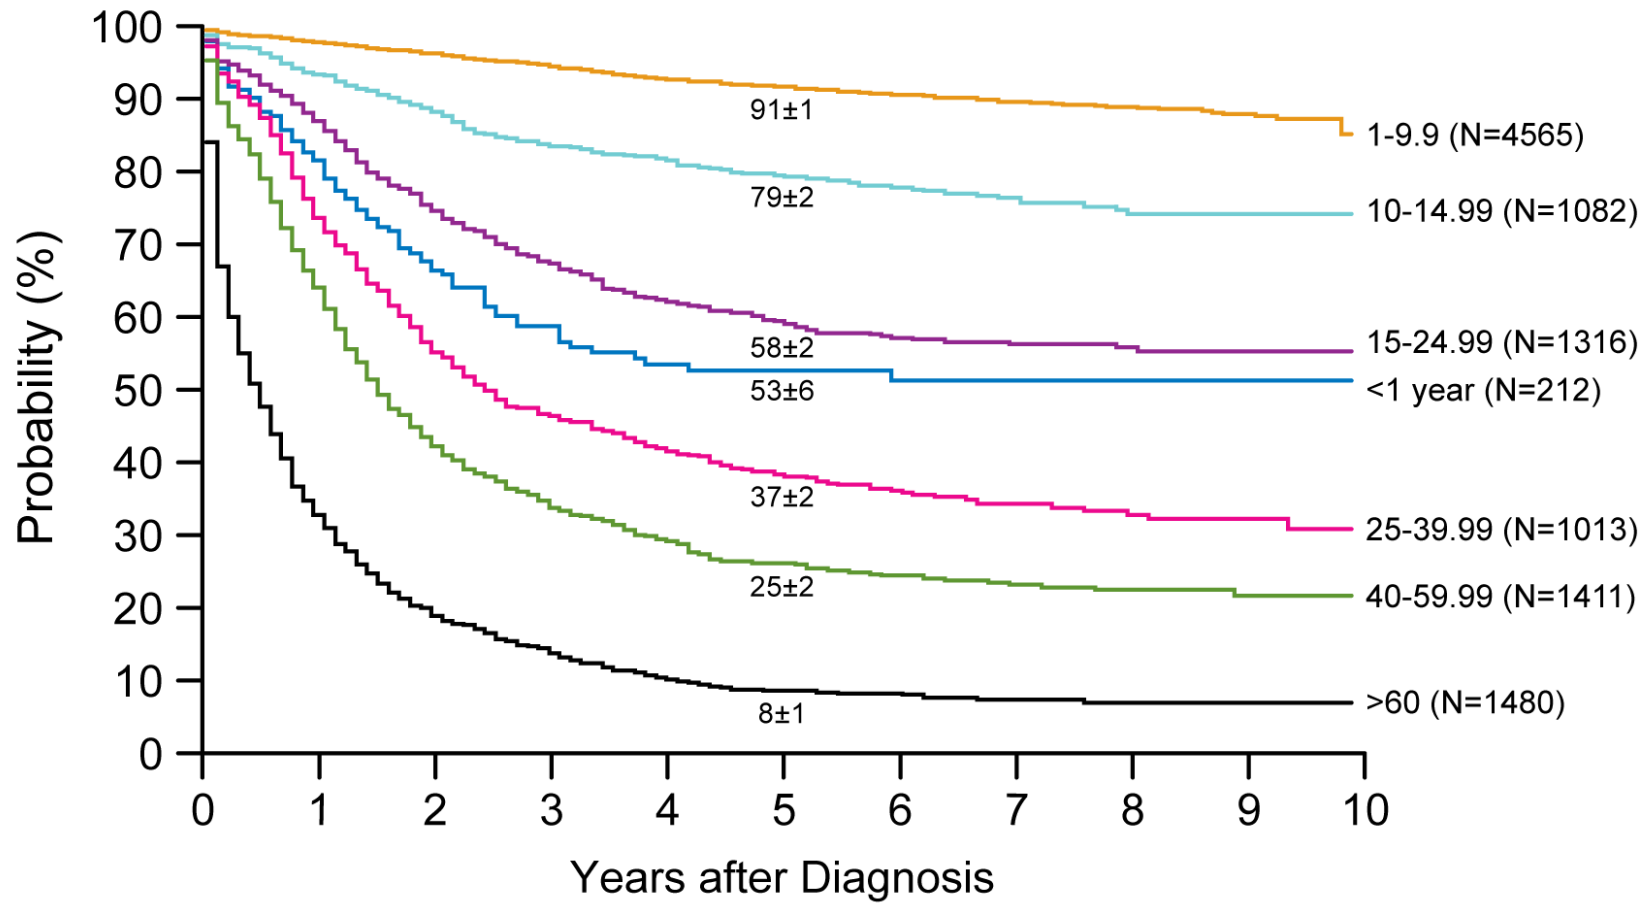

**Web Figure 2. Kaplan-Meier estimates of overall survival according to age at diagnosis in 11079 patients with acute lymphoblastic leukaemia newly diagnosed after January 1, 2000 who were registered in the Surveillance, Epidemiology and End Results (SEER) Program of the United States National Cancer Institute.** Age in years is shown at right. Five-year overall survival estimates ( $\pm$ SE) are listed on the respective curves.

**Supplementary Table 3: Antileukaemic drugs in current clinical trials**

| <b>Class</b>                                   | <b>Agent</b>                                                                        | <b>Target</b>                                          | <b>Indication</b>                                                                       |
|------------------------------------------------|-------------------------------------------------------------------------------------|--------------------------------------------------------|-----------------------------------------------------------------------------------------|
| <b>Purine nucleoside analogue</b>              |                                                                                     |                                                        |                                                                                         |
|                                                | Clofarabine <sup>25</sup>                                                           | Ribonucleotide reductase; DNA polymerase; mitochondria | All ALL                                                                                 |
|                                                | Nelarabine <sup>26</sup>                                                            | Ribonucleotide reductase; DNA synthesis                | T-ALL                                                                                   |
|                                                | Forodesine                                                                          | Purine nucleoside phosphorylase                        | T-ALL                                                                                   |
| <b>Vinca alkaloid</b>                          |                                                                                     |                                                        |                                                                                         |
|                                                | Vincristine sulfate liposome <sup>27</sup>                                          | Tubulin                                                | All ALL                                                                                 |
| <b>Kinase inhibitor</b>                        |                                                                                     |                                                        |                                                                                         |
| ABL1 kinase inhibitor                          |                                                                                     |                                                        |                                                                                         |
|                                                | Dasatinib; <sup>28</sup> Nilotinib; <sup>29</sup> Imatinib; <sup>30</sup> Ponatinib | ABL1 kinase; platelet-derived growth factor receptor B | <i>BCR-ABL1</i> -positive ALL; <i>BCR-ABL1</i> -like ALL (eg, <i>NUP214-ABL1</i> )      |
| Aurora kinase inhibitor                        |                                                                                     |                                                        |                                                                                         |
|                                                | Alisertib                                                                           | Aurora A kinase                                        | <i>BCR-ABL1</i> -positive ALL                                                           |
| Janus kinase (JAK) inhibitor                   |                                                                                     |                                                        |                                                                                         |
|                                                | Ruxolitinib; TG101348; CYT387                                                       | JAK                                                    | JAK-mutated ALL; <i>BCR-ABL1</i> -like ALL (eg, <i>BCR-JAK2</i> ; mutated <i>IL7R</i> ) |
| Tyrosine kinase inhibitor                      |                                                                                     |                                                        |                                                                                         |
|                                                | Lestaurtinib; Midostaurin; Sorafenib; Quizartinib; Tandutinib; Sunitinib            | FMS-like tyrosine kinase 3                             | <i>MLL</i> -rearranged ALL; hyperdiploid ALL                                            |
| <b>Other molecular or signaling inhibitor</b>  |                                                                                     |                                                        |                                                                                         |
| Proteasome inhibitor                           |                                                                                     |                                                        |                                                                                         |
|                                                | Bortezomib <sup>31</sup>                                                            | Ubiquitin-proteasome pathway                           | All ALL                                                                                 |
| Mammalian target of rapamycin (mTOR) inhibitor |                                                                                     |                                                        |                                                                                         |
|                                                | Sirolimus; Temsirolimus; Everolimus                                                 | mTOR                                                   | All ALL                                                                                 |
| Farnesyltransferase inhibitor                  |                                                                                     |                                                        |                                                                                         |
|                                                | Tipifarnib; Lonafarnib                                                              | Ras, lamin A                                           | All ALL                                                                                 |
| $\gamma$ -Secretase inhibitor                  |                                                                                     |                                                        |                                                                                         |
|                                                | RO4929097                                                                           | $\gamma$ -Secretase                                    | T-ALL                                                                                   |
| Angiogenesis inhibitor                         |                                                                                     |                                                        |                                                                                         |
|                                                | Bevacizumab                                                                         | Vascular endothelial growth factor                     | All ALL                                                                                 |

|                                       |                                                          |                                                  |                                     |
|---------------------------------------|----------------------------------------------------------|--------------------------------------------------|-------------------------------------|
| Apoptosis inducer                     | Obatoclox; Oblimersen                                    | Bcl-2                                            | All ALL                             |
| Chemokine receptor (CXCR4) antagonist | Plerixafor                                               | CXCL12 (SDF1)/CXCR4 axis                         | All ALL                             |
| <b>Epigenetic therapy</b>             |                                                          |                                                  |                                     |
| DNA methyltransferase inhibitor       | Azacitidine; Decitabine                                  | DNA methyltransferase                            | All ALL                             |
| Histone methyltransferase inhibitor   | EPZ-5676                                                 | DOT1L                                            | <i>MLL</i> -rearranged ALL          |
| Histone deacetylase inhibitor         | Vorinostat; Panobinostat;<br>Depsipeptide; Valproic acid | Histone deacetylase                              | All ALL                             |
| <b>Immune therapy</b>                 |                                                          |                                                  |                                     |
| Monoclonal antibody                   | Blinatumomab <sup>32</sup>                               | CD19 (engages CD3 T cells)                       | CD19-positive ALL                   |
|                                       | SAR3419                                                  | CD19                                             | CD19-positive ALL                   |
|                                       | DT2219ARL                                                | CD19 and 22                                      | CD19/CD22-positive ALL              |
|                                       | Rituximab <sup>33</sup>                                  | CD20                                             | CD20-positive ALL                   |
|                                       | Epratuzumab; <sup>34</sup>                               | CD22                                             | CD22-positive ALL                   |
|                                       | Moxetumomab;                                             |                                                  |                                     |
|                                       | Inotuzumab ozogamicin <sup>35</sup>                      |                                                  |                                     |
|                                       | Alemtuzumab <sup>36</sup>                                | CD52                                             | CD52-positive ALL                   |
| Cellular therapy                      | Natural killer cells                                     | Killer immunoglobulin-like receptor (KIR)-ligand | Donor KIR-recipient ligand mismatch |
|                                       | T cells with CD19-specific chimeric antigen receptor     | CD19                                             | CD19-positive ALL                   |

---

ALL, acute lymphoblastic leukaemia



## References

1. Papaemmanuil E, Hosking FJ, Vijayakrishnan J, et al. Loci on 7p12.2, 10q21.2 and 14q11.2 are associated with risk of childhood acute lymphoblastic leukemia. *Nat Genet* 2009; **41**: 1006-10.
2. Trevino LR, Yang W, French D, et al. Germline genomic variants associated with childhood acute lymphoblastic leukemia. *Nat Genet* 2009; **41**: 1001-5.
3. Prasad R, Hosking FJ, Vijayakrishnan J, et al. Verification of the susceptibility loci on 7p12.2, 10q21.2 and 14q11.2 in precursor B-cell acute lymphoblastic leukemia of childhood. *Blood* 2010; **115**: 1765-7.
4. Sherborne AL, Hosking FJ, Prasad RB, et al. Variation in CDKN2A at 9p21.3 influences childhood acute lymphoblastic leukemia risk. *Nat Genet* 2010; **42**: 492-4.
5. Mullighan CG, Goorha S, Radtke I, et al. Genome-wide analysis of genetic alterations in acute lymphoblastic leukaemia. *Nature* 2007; **446**: 758-64.
6. Mullighan CG, Miller CB, Radtke I, et al. BCR-ABL1 lymphoblastic leukaemia is characterized by the deletion of Ikaros. *Nature* 2008; **453**: 110-4.
7. Kuiper RP, Schoenmakers EF, van Reijmersdal SV, et al. High-resolution genomic profiling of childhood ALL reveals novel recurrent genetic lesions affecting pathways involved in lymphocyte differentiation and cell cycle progression. *Leukemia* 2007; **21**: 1258-66.
8. Iacobucci I, Storlazzi CT, Cilloni D, et al. Identification and molecular characterization of recurrent genomic deletions on 7p12 in the IKZF1 gene in a large cohort of BCR-ABL1-positive acute lymphoblastic leukemia patients: on behalf of Gruppo Italiano Malattie Ematologiche dell'Adulto Acute Leukemia Working Party (GIMEMA AL WP). *Blood* 2009; **114**: 2159-67.
9. Martinelli G, Iacobucci I, Storlazzi CT, et al. IKZF1 (Ikaros) deletions in BCR-ABL1-positive acute lymphoblastic leukemia are associated with short disease-free survival and high rate of cumulative incidence of relapse: a GIMEMA AL WP report. *J Clin Oncol* 2009; **27**: 5202-7.
10. Mullighan CG, Su X, Zhang J, et al. Deletion of IKZF1 and Prognosis in Acute Lymphoblastic Leukemia. *N Engl J Med* 2009; **360**: 470-80.
11. Kuiper RP, Waanders E, van der Velden VH, et al. IKZF1 deletions predict relapse in uniformly treated pediatric precursor B-ALL. *Leukemia* 2010; **24**: 1258-64.
12. Den Boer ML, van Slegtenhorst M, De Menezes RX, et al. A subtype of childhood acute lymphoblastic leukaemia with poor treatment outcome: a genome-wide classification study. *Lancet Oncol* 2009; **10**: 125-34.
13. Bercovich D, Ganmore I, Scott LM, et al. Mutations of JAK2 in acute lymphoblastic leukaemias associated with Down's syndrome. *Lancet* 2008; **372**: 1484-92.
14. Gaikwad A, Rye CL, Devidas M, et al. Prevalence and clinical correlates of JAK2 mutations in Down syndrome acute lymphoblastic leukaemia. *Br J Haematol* 2009; **144**: 930-2.
15. Kearney L, Gonzalez De Castro D, Yeung J, et al. A specific JAK2 mutation (JAK2R683) and multiple gene deletions in Down syndrome acute lymphoblastic leukaemia. *Blood* 2008; **113**: 646-8.
16. Mullighan CG, Zhang J, Harvey RC, et al. JAK mutations in high-risk childhood acute lymphoblastic leukemia. *Proc Natl Acad Sci U S A* 2009; **106**: 9414-8.

17. Russell LJ, Capasso M, Vater I, et al. Deregulated expression of cytokine receptor gene, CRLF2, is involved in lymphoid transformation in B-cell precursor acute lymphoblastic leukemia. *Blood* 2009; **114**: 2688-98.
18. Mullighan CG, Collins-Underwood JR, Phillips LA, et al. Rearrangement of CRLF2 in B-progenitor- and Down syndrome-associated acute lymphoblastic leukemia. *Nat Genet* 2009; **41**: 1243-6.
19. Yoda A, Yoda Y, Chiaretti S, et al. Functional screening identifies CRLF2 in precursor B-cell acute lymphoblastic leukemia. *Proc Natl Acad Sci U S A* 2010; **107**: 252-7.
20. Hertzberg L, Vendramini E, Ganmore I, et al. Down syndrome acute lymphoblastic leukemia: a highly heterogeneous disease in which aberrant expression of CRLF2 is associated with mutated JAK2: a report from the iBFM Study Group. *Blood* 2010; **115**: 1006-17.
21. Harvey RC, Mullighan CG, Chen IM, et al. Rearrangement of CRLF2 is associated with mutation of JAK kinases, alteration of IKZF1, Hispanic/Latino ethnicity, and a poor outcome in pediatric B-progenitor acute lymphoblastic leukemia. *Blood* 2010; **115**: 5312-21.
22. Cario G, Zimmermann M, Romey R, et al. Presence of the P2RY8-CRLF2 rearrangement is associated with a poor prognosis in non-high-risk precursor B-cell acute lymphoblastic leukemia in children treated according to the ALL-BFM 2000 protocol. *Blood* 2010; **115**: 5393-7.
23. Mullighan CG, Zhang J, Kasper LH, et al. CREBBP mutations in relapsed acute lymphoblastic leukaemia. *Nature* 2011; **471**: 235-9.
24. Pasqualucci L, Dominguez-Sola D, Chiarenza A, et al. Inactivating mutations of acetyltransferase genes in B-cell lymphoma. *Nature* 2011; **471**: 189-95.
25. Hijiya N, Thomson B, Isakoff MS, et al. Phase 2 trial of clofarabine in combination with etoposide and cyclophosphamide in pediatric patients with refractory or relapsed acute lymphoblastic leukemia. *Blood* 2011; **118**: 6043-9.
26. Dunsmore KP, Devidas M, Linda SB, et al. Pilot study of nelarabine in combination with intensive chemotherapy in high-risk T-cell acute lymphoblastic leukemia: a report from the Children's Oncology Group. *J Clin Oncol* 2012; **30**: 2753-9.
27. O'Brien S, Schiller G, Lister J, et al. High-Dose Vincristine Sulfate Liposome Injection for Advanced, Relapsed, and Refractory Adult Philadelphia Chromosome-Negative Acute Lymphoblastic Leukemia. *J Clin Oncol* 2012; PMID 23169518.
28. Ravandi F, O'Brien S, Thomas D, et al. First report of phase 2 study of dasatinib with hyper-CVAD for the frontline treatment of patients with Philadelphia chromosome-positive (Ph+) acute lymphoblastic leukemia. *Blood* 2010; **116**: 2070-7.
29. Ottmann OG, Larson RA, Kantarjian HM, et al. Phase II study of nilotinib in patients with relapsed or refractory Philadelphia chromosome-positive acute lymphoblastic leukemia. *Leukemia* 2012; PMID 23138184.
30. Schultz KR, Bowman WP, Aledo A, et al. Improved early event-free survival with imatinib in Philadelphia chromosome-positive acute lymphoblastic leukemia: a children's oncology group study. *J Clin Oncol* 2009; **27**: 5175-81.
31. Messinger YH, Gaynon PS, Sposto R, et al. Bortezomib with chemotherapy is highly active in advanced B-precursor acute lymphoblastic leukemia: Therapeutic Advances in Childhood Leukemia & Lymphoma (TACL) Study. *Blood* 2012; **120**: 285-90.
32. Topp MS, Kufer P, Gokbuget N, et al. Targeted therapy with the T-cell-engaging antibody blinatumomab of chemotherapy-refractory minimal residual disease in B-lineage acute lymphoblastic leukemia patients results in high response rate and prolonged leukemia-free survival. *J Clin Oncol* 2011; **29**: 2493-8.

33. Thomas DA, O'Brien S, Faderl S, et al. Chemoimmunotherapy with a modified hyper-CVAD and rituximab regimen improves outcome in de novo Philadelphia chromosome-negative precursor B-lineage acute lymphoblastic leukemia. *J Clin Oncol* 2010; **28**: 3880-9.
34. Raetz EA, Cairo MS, Borowitz MJ, et al. Chemoimmunotherapy reinduction with epratuzumab in children with acute lymphoblastic leukemia in marrow relapse: a Children's Oncology Group Pilot Study. *J Clin Oncol* 2008; **26**: 3756-62.
35. Kantarjian H, Thomas D, Jorgensen J, et al. Inotuzumab ozogamicin, an anti-CD22-calecheamicin conjugate, for refractory and relapsed acute lymphocytic leukaemia: a phase 2 study. *Lancet Oncol* 2012; **13**: 403-11.
36. Angiolillo AL, Yu AL, Reaman G, et al. A phase II study of Campath-1H in children with relapsed or refractory acute lymphoblastic leukemia: a Children's Oncology Group report. *Pediatr Blood Cancer* 2009; **53**: 978-83.
